# Supplementary material for: Genome Sequencing of Cladobotryum protrusum Provides Insights into the Evolution and Pathogenic Mechanisms of the Cobweb Disease Pathogen on Cultivated Mushroom
Source: MDPI journal article supplement (doi:10.3390/genes10020124), 2019-02-08
Supplement: s1 [file s1]

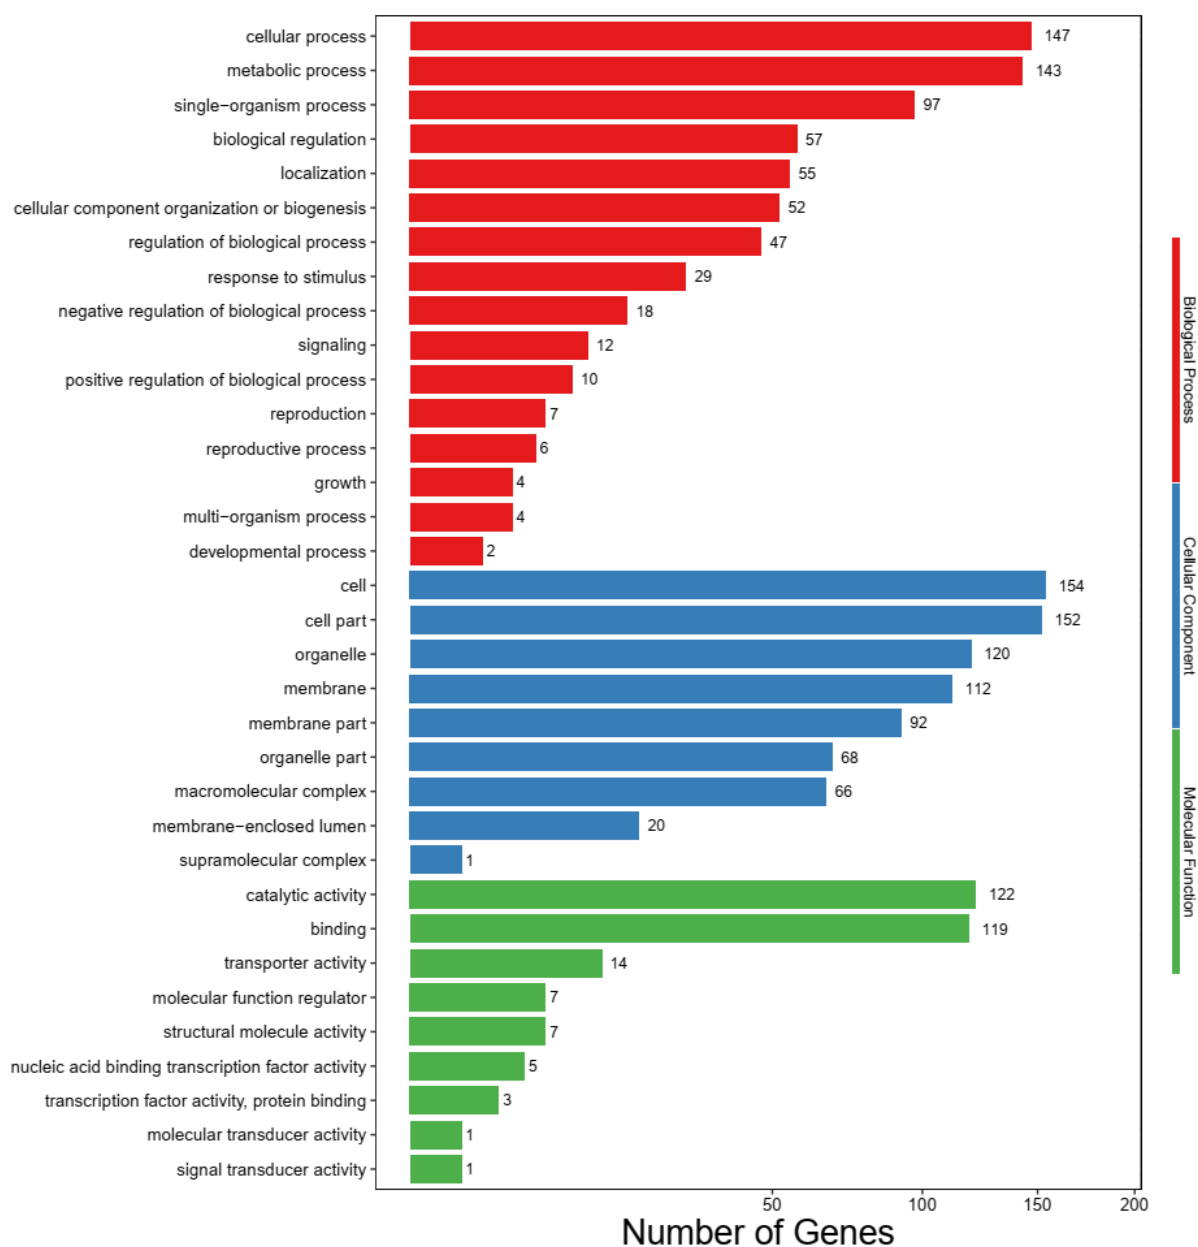

Figure S1. Gene Ontology (GO) classification of the positive selection gene in *C. protrusum*

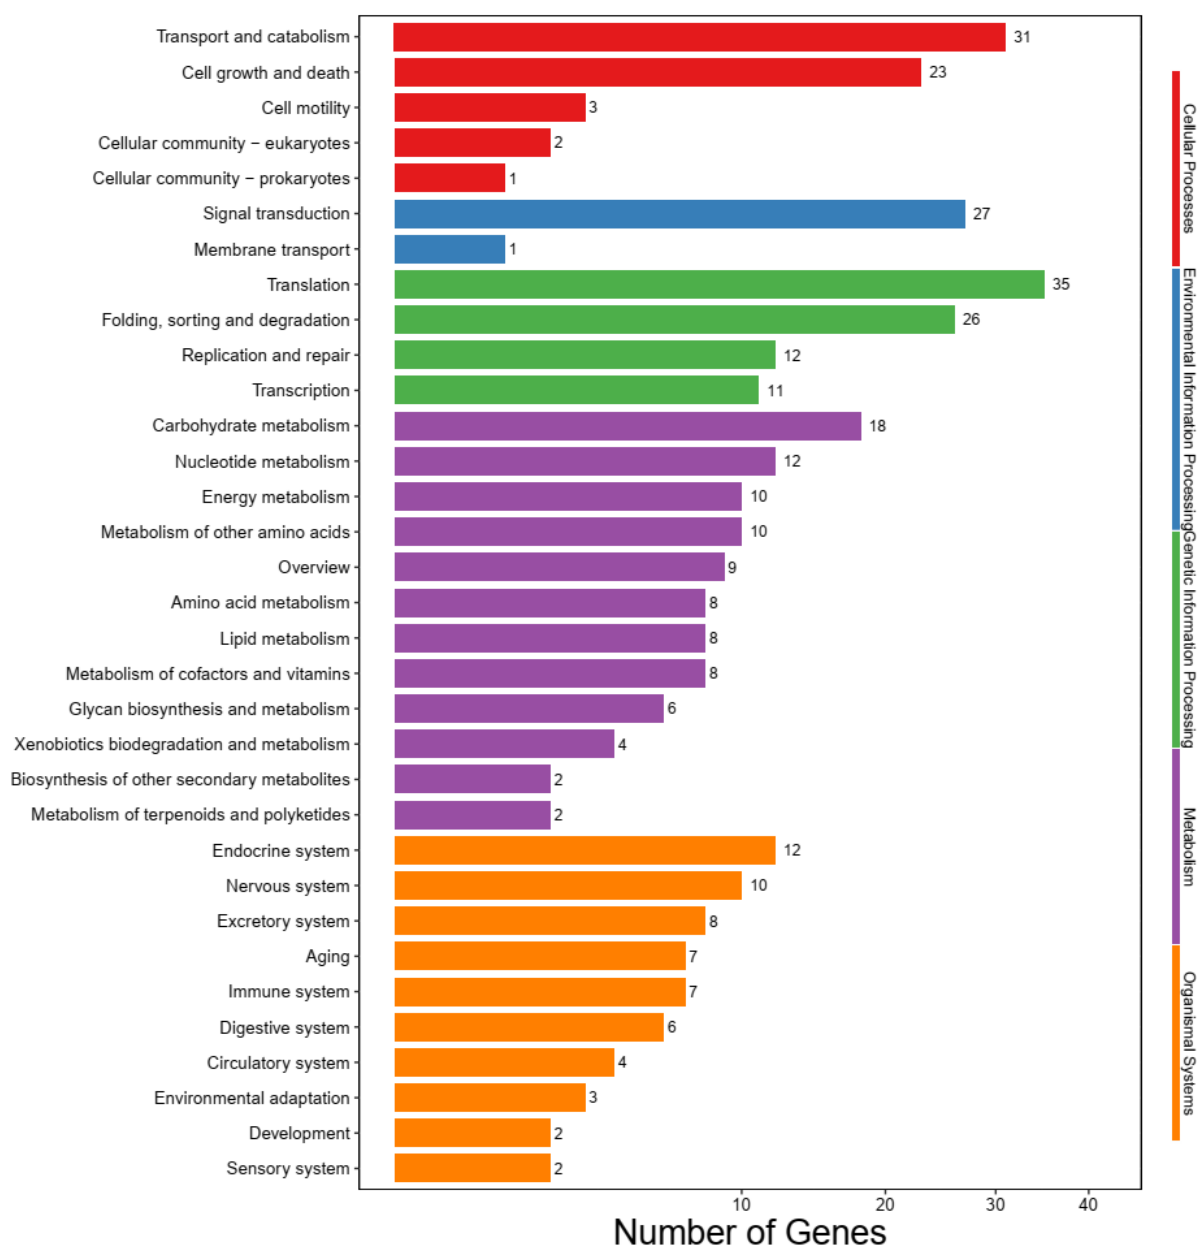

Figure S2. KEGG classification of the positive selection genes in *C. protrusum*

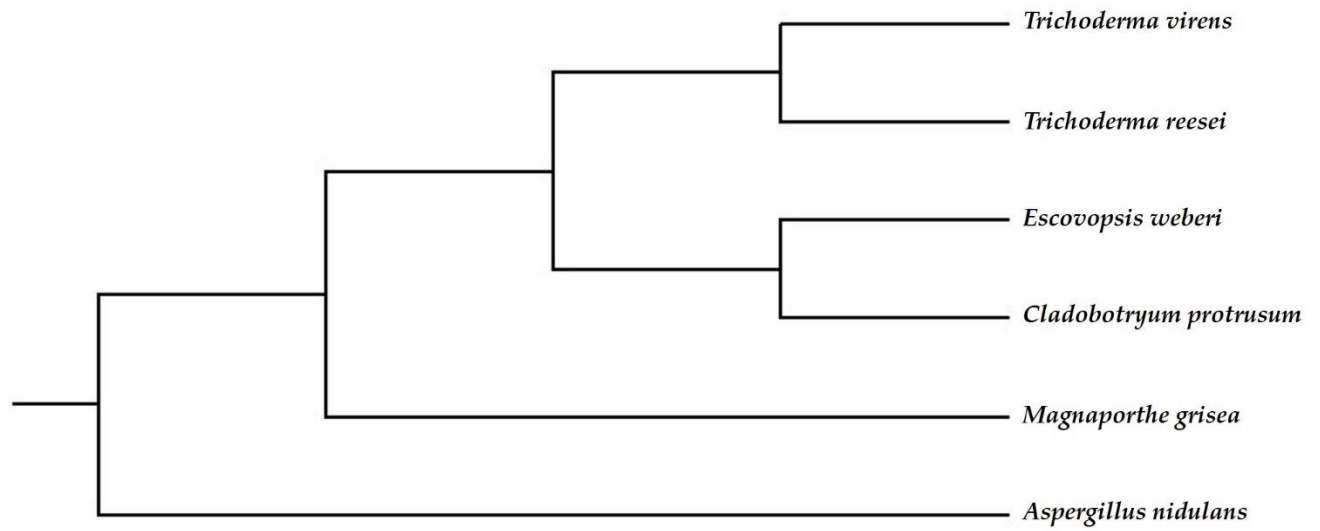

Figure S3. Phylogenetic analysis of *C. protrusum* and three fungi in the family Hypocreaceae. *Magnaporthe grisea* and *Aspergillus nidulans* are outgroups.
